# Supplementary material
Source: PubMed Central journal article supplement (PMC2764554)

[F] Supplemental Text and Figures  
Supplemental Figure 1

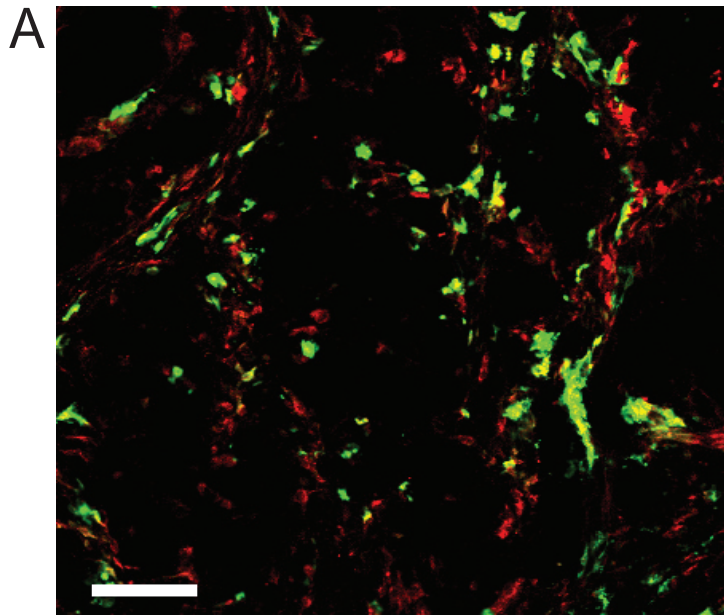

MHC Class II CD11c

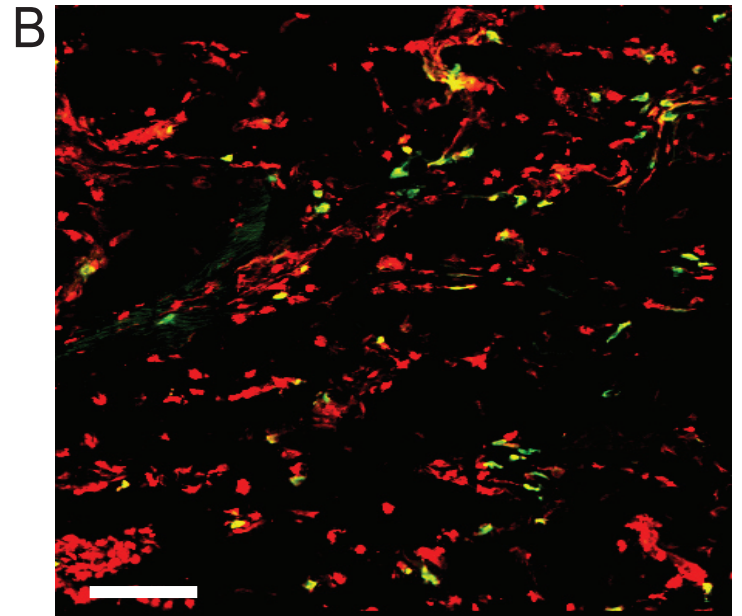

MHC Class II CD11b

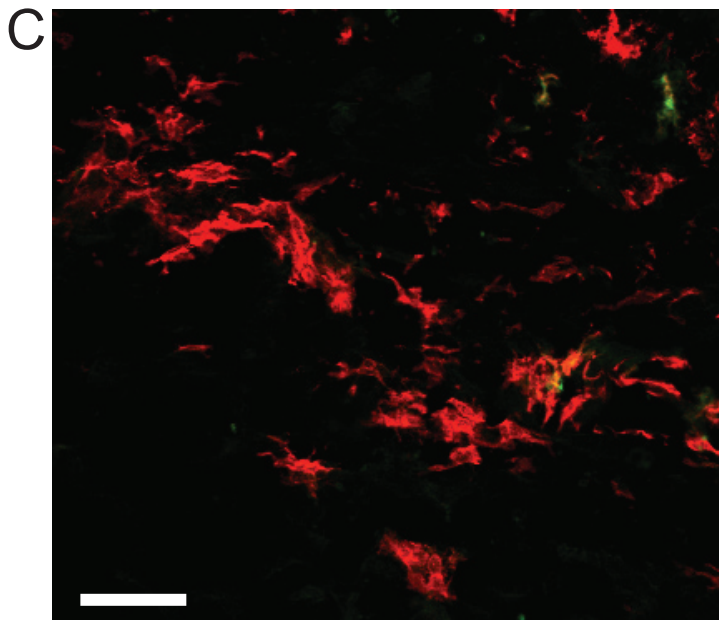

MHC Class II F4/80

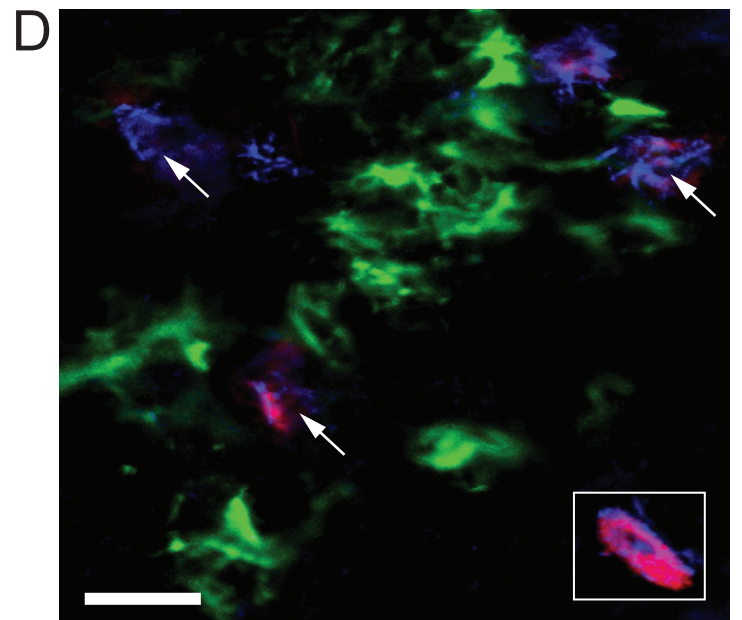

MHC Class II Kit Avidin

## Supplemental Figure 2

FP-R1 = Monocyte derived DCs

FP-R2 = CD11b<sup>low</sup> DCsFP-R3 = CD11c<sup>hi</sup> DCsFP-R4 = CD11c<sup>mid</sup> DCs

FP-R1

FP-R2

FP-R3

FP-R4

CD40

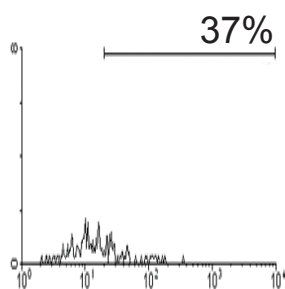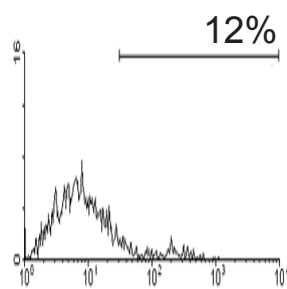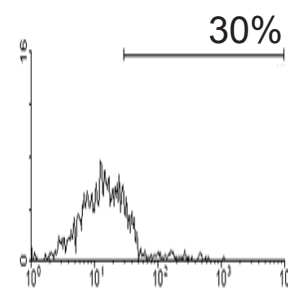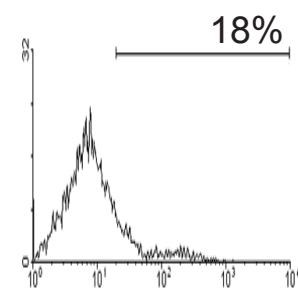

CD86

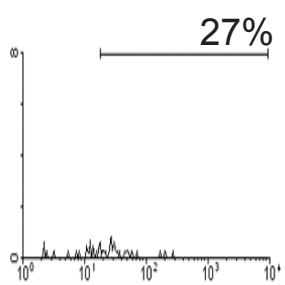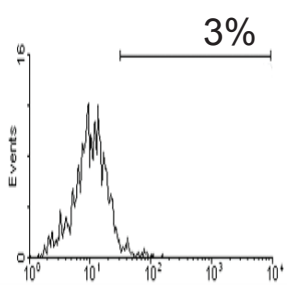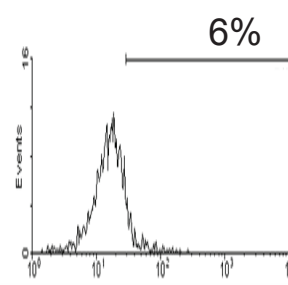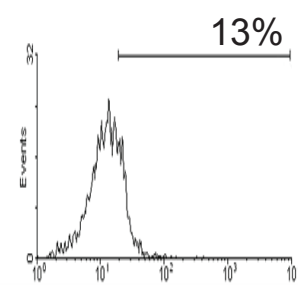MHC  
Class II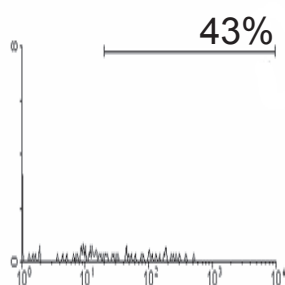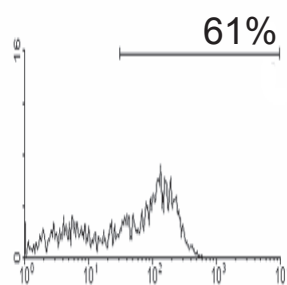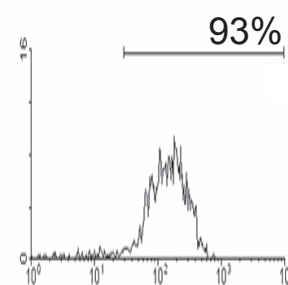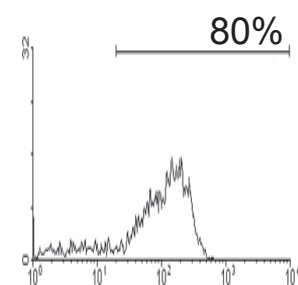

F4/80

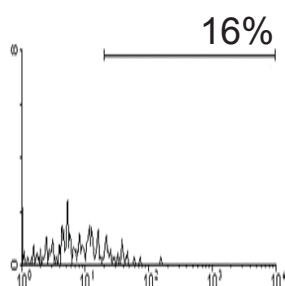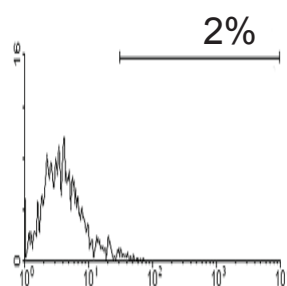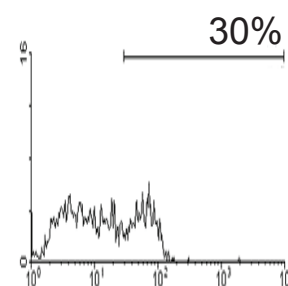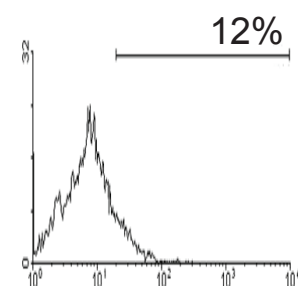

IMC

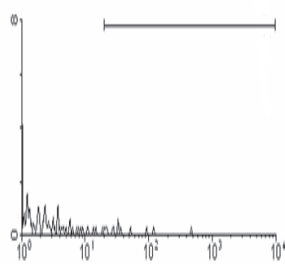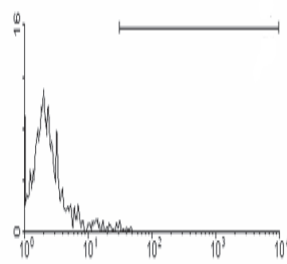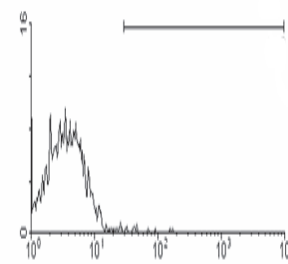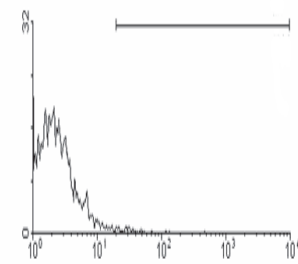

## Supplemental Figure 3

FP-R1 = Monocyte derived DCs

FP-R2 = CD11b<sup>low</sup> DCsFP-R3 = CD11c<sup>hi</sup> DCsFP-R4 = CD11c<sup>mid</sup> DCs

■ = Saline

□ = *E. coli*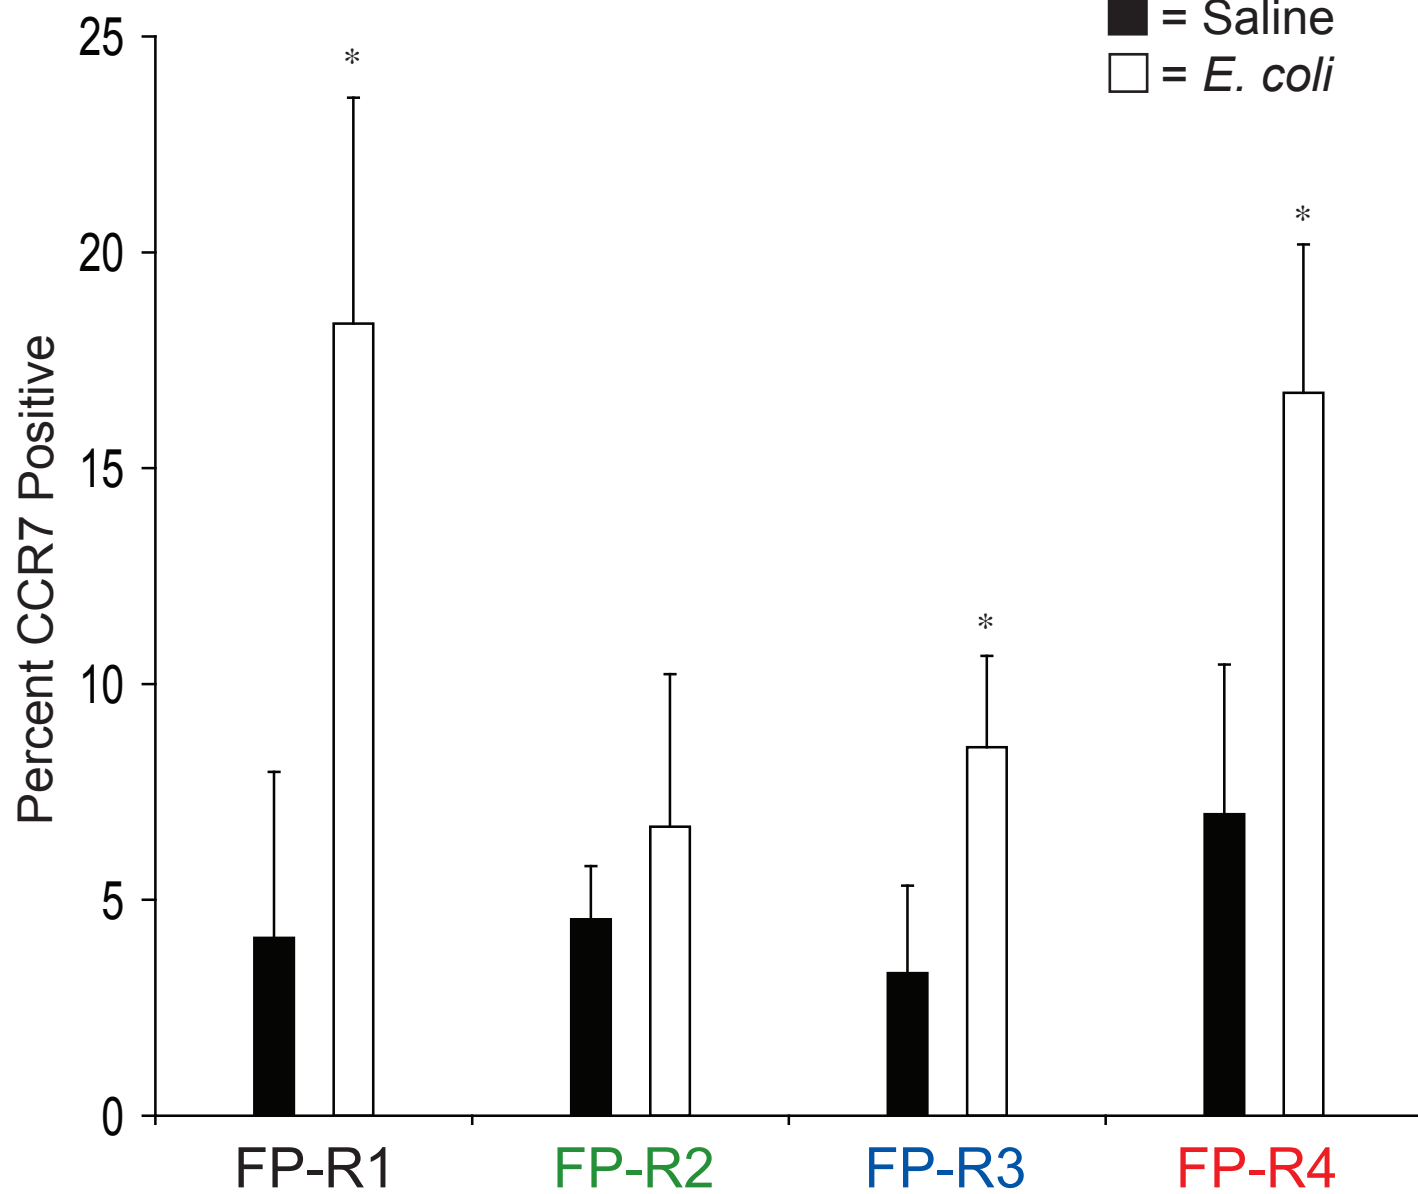

# Supplemental Figure 4

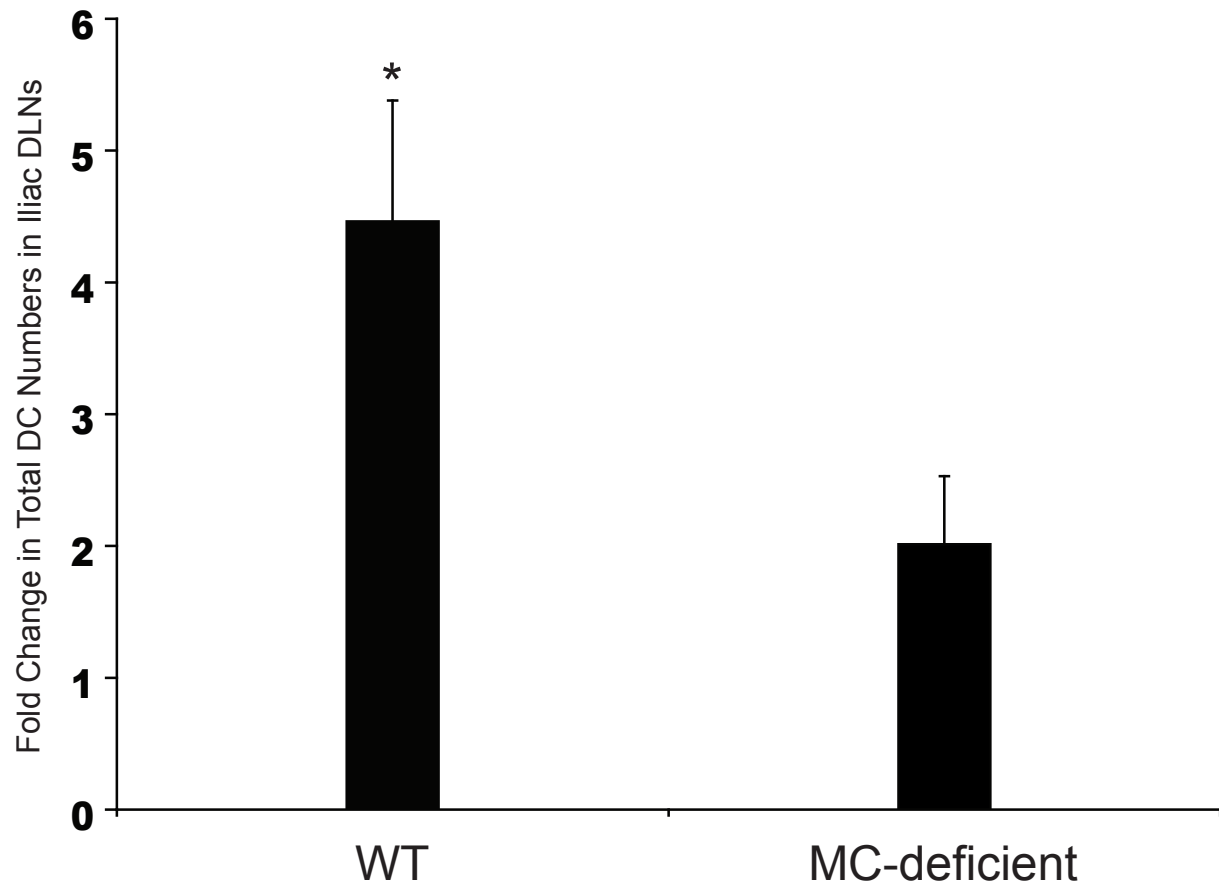

## Supplemental Figure 5

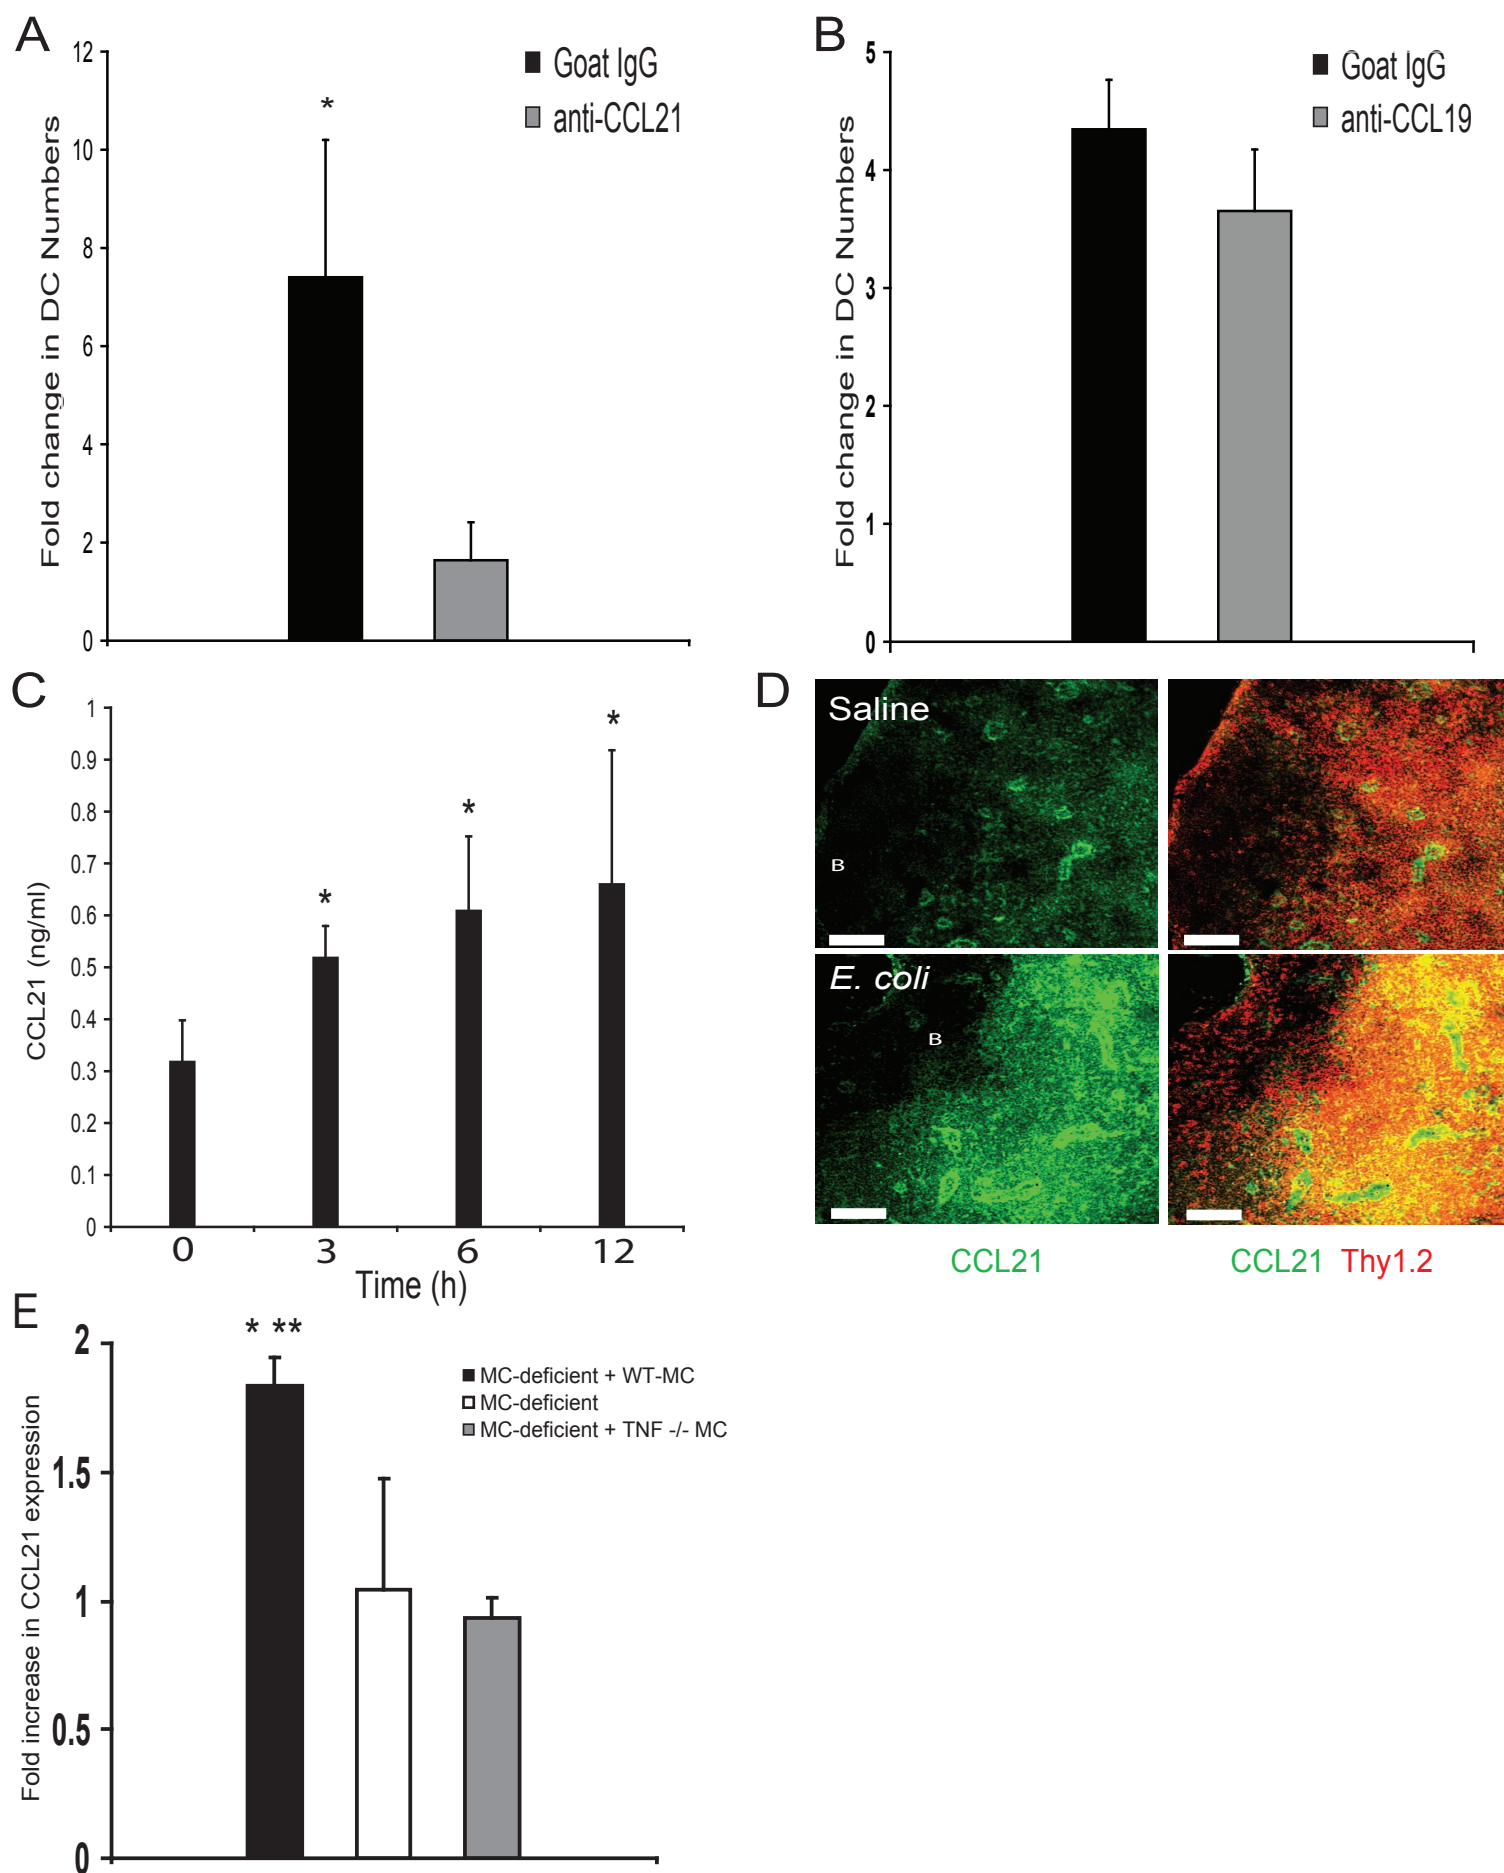

## Supplemental Figure 6

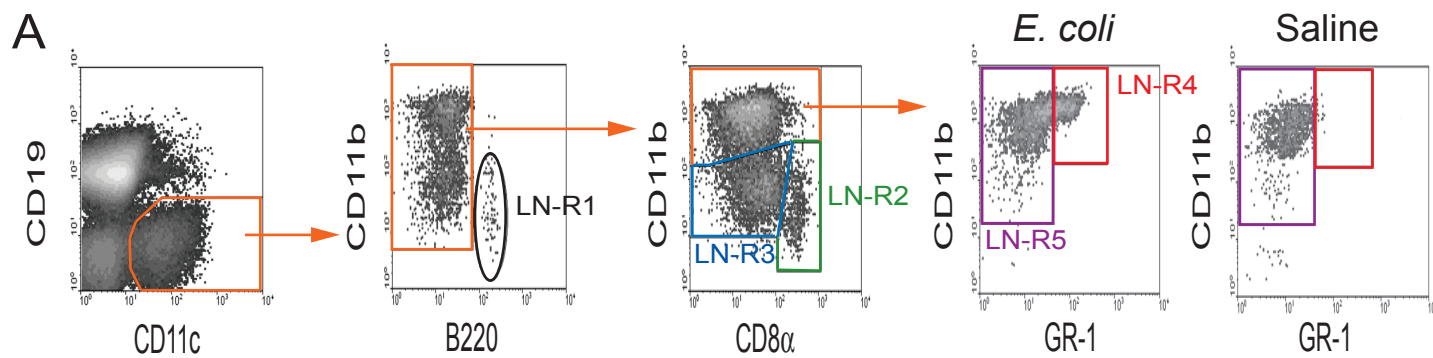**B**

| DC Subsets                    | Markers                                                                                                                                                              | Subset | Total Numbers: Saline | Percent Total DC: Saline | Total Numbers: <i>E. coli</i> | Percent Total DC: <i>E. coli</i> | p Value* |
|-------------------------------|----------------------------------------------------------------------------------------------------------------------------------------------------------------------|--------|-----------------------|--------------------------|-------------------------------|----------------------------------|----------|
| Plasmacytoid DCs              | CD11c <sup>+</sup> CD11b <sup>-</sup> B220 <sup>+</sup> (Asselin-Paturel et al., 2001; Nakano et al., 2001)                                                          | LN-R1  | 347±197               | 5.5%                     | 982±716                       | 5.8%                             | 0.04     |
| CD8 $\alpha$ <sup>+</sup> DCs | CD11c <sup>+</sup> CD11b <sup>-</sup> B220 <sup>-</sup> CD8 $\alpha$ <sup>+</sup> (Vremec and Shortman, 1997)                                                        | LN-R2  | 374±198               | 5.4%                     | 1582±674                      | 9.8%                             | 0.0004   |
| Langerhans cells/dermal DCs   | CD11c <sup>+</sup> CD11b <sup>mid</sup> B220 <sup>0</sup> CD8 $\alpha$ <sup>-</sup> (Henri et al., 2001; Iezzi et al., 2006; Kamath et al., 2002; Leon et al., 2007) | LN-R3  | 3756±996              | 56.9%                    | 6424±1616                     | 41.6%                            | 0.0019   |
| Monocyte-derived DCs          | CD11c <sup>+</sup> CD11b <sup>hi</sup> B220 <sup>-</sup> CD8 $\alpha$ <sup>-</sup> GR1 <sup>+</sup> (Leon et al., 2007)                                              | LN-R4  | 23±21                 | .3%                      | 771±350                       | 4.8%                             | 0.00007  |
| CD11b <sup>hi</sup>           | CD11c <sup>+</sup> CD11b <sup>hi</sup> B220 <sup>-</sup> CD8 $\alpha$ <sup>-</sup> GR1 <sup>+</sup>                                                                  | LN-R5  | 2170±893              | 31.9%                    | 6238±2640                     | 38.1%                            | 0.0017   |

\* p values comparing total numbers within each DC subset from saline and *E. coli* challenged samples using Student's T-test.

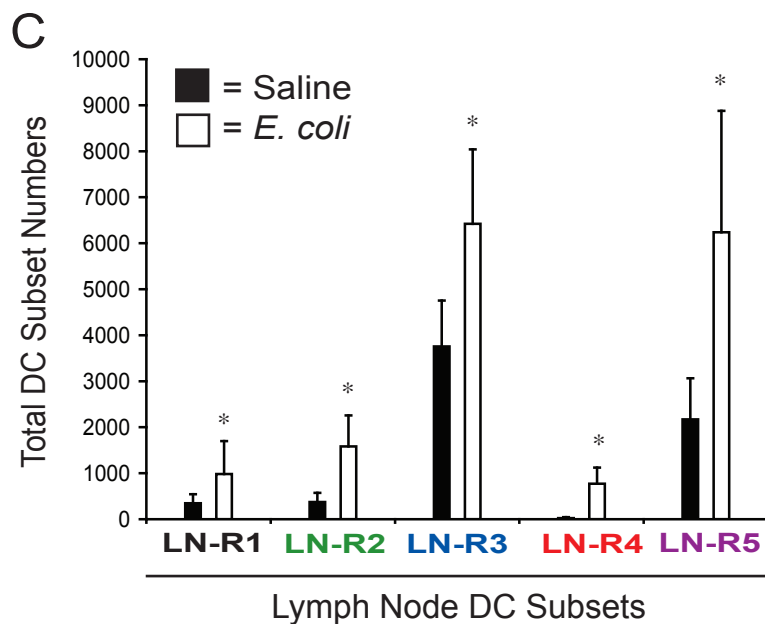

# Supplemental Figure 7

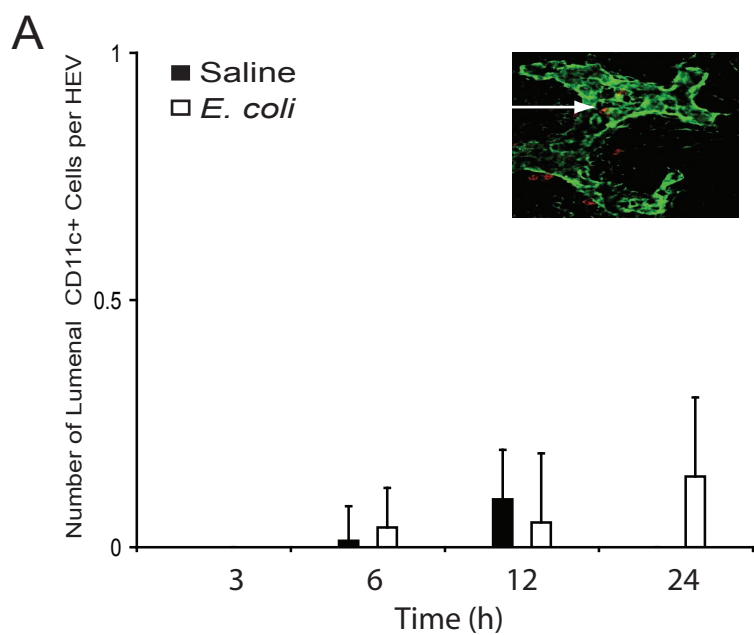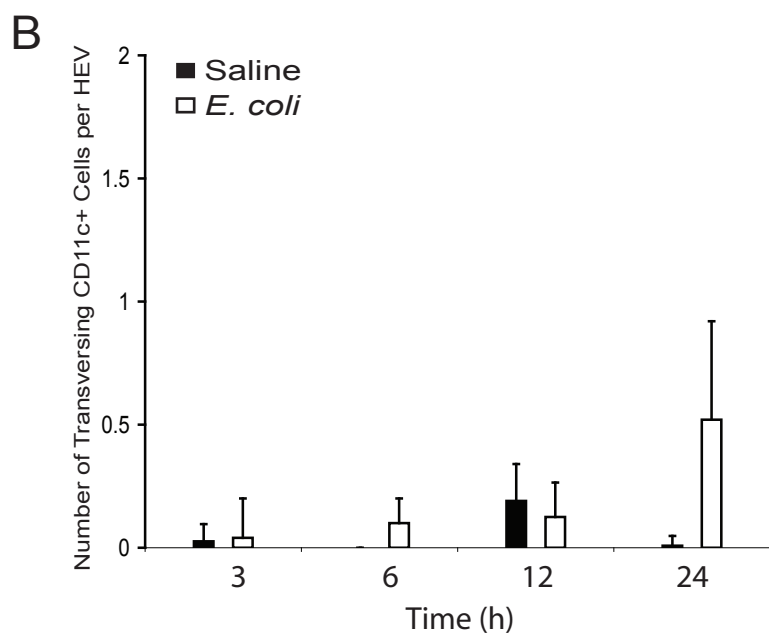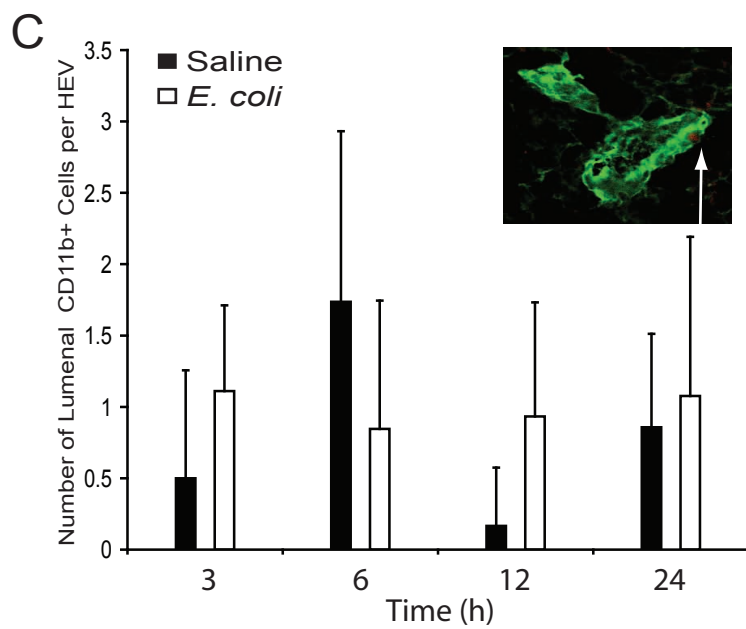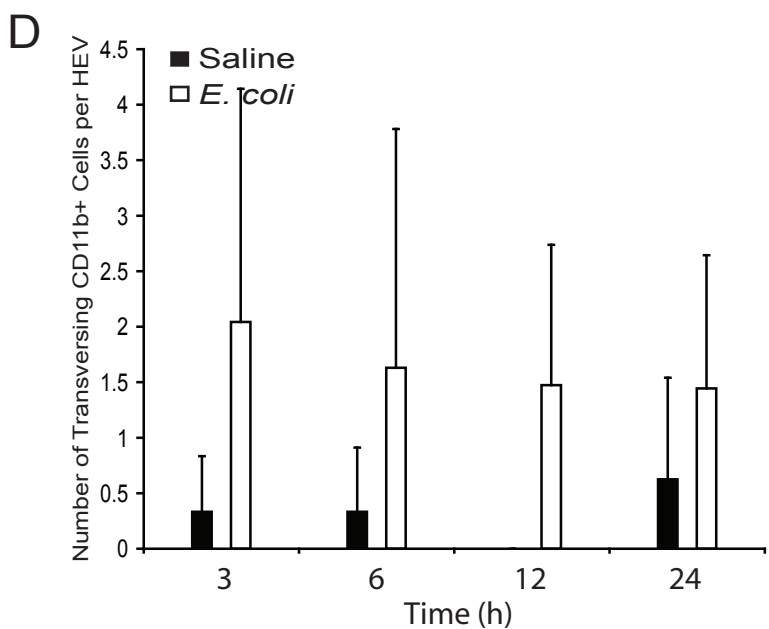

Supplement: NIHMS149878-supplement-01.pdf [file NIHMS149878-supplement-01.pdf]
